# Supplementary material for: Unusual Structural Features in the Adduct of Dirhodium Tetraacetate with Lysozyme
Source: MDPI journal article supplement (doi:10.3390/ijms22031496), 2021-02-02
Supplement: s1 [file s1]

*Article*

# Unusual Structural Features in the Adduct of Dirhodium Tetraacetate with Lysozyme

Domenico Loreto <sup>1</sup>, Giarita Ferraro <sup>2</sup> and Antonello Merlino <sup>1,\*</sup>

<sup>1</sup> Department of Chemical Sciences, University of Naples Federico II, 80126 Napoli, Italy; domenico.loreto@unina.it

<sup>2</sup> Department of Chemistry “Ugo Schiff”, University of Florence, via della Lastruccia, 3-13, 50019 Sesto Fiorentino, Florence, Italy; giarita.ferraro@unifi.it

\* Correspondence: antonello.merlino@unina.it

**Supporting information**

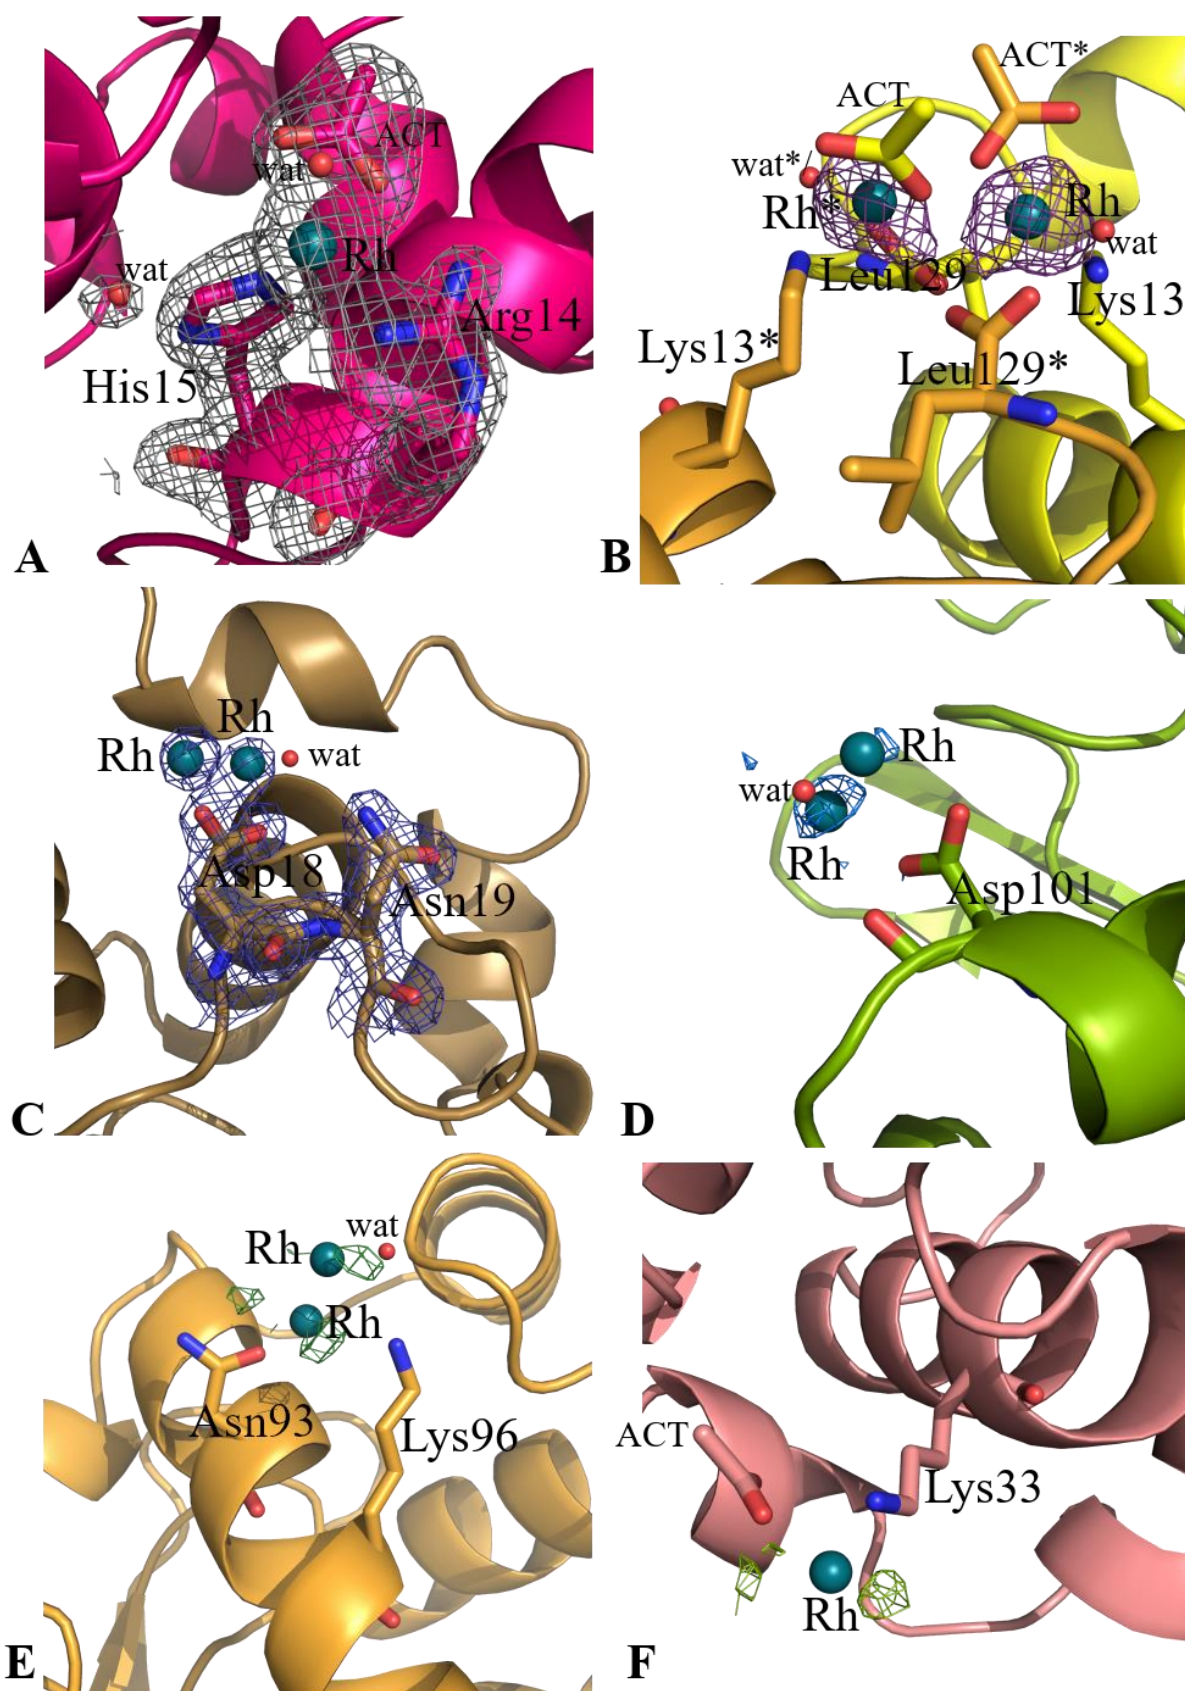

**Figure S1.** Examples of anomalous difference electron density maps at the Rh binding sites close to side chains of Arg14 and His15 (A), close to the C-terminal tail (B), close to side chain of Asp18 (C), Asp101 (D), Asn93 and Lys96 (E) and of Lys33 (F) in the structures of Rh/HEWL adducts here reported. Maps are contoured at  $3.0 \sigma$  in panels A and B and at  $2.0 \sigma$  in the other panels.

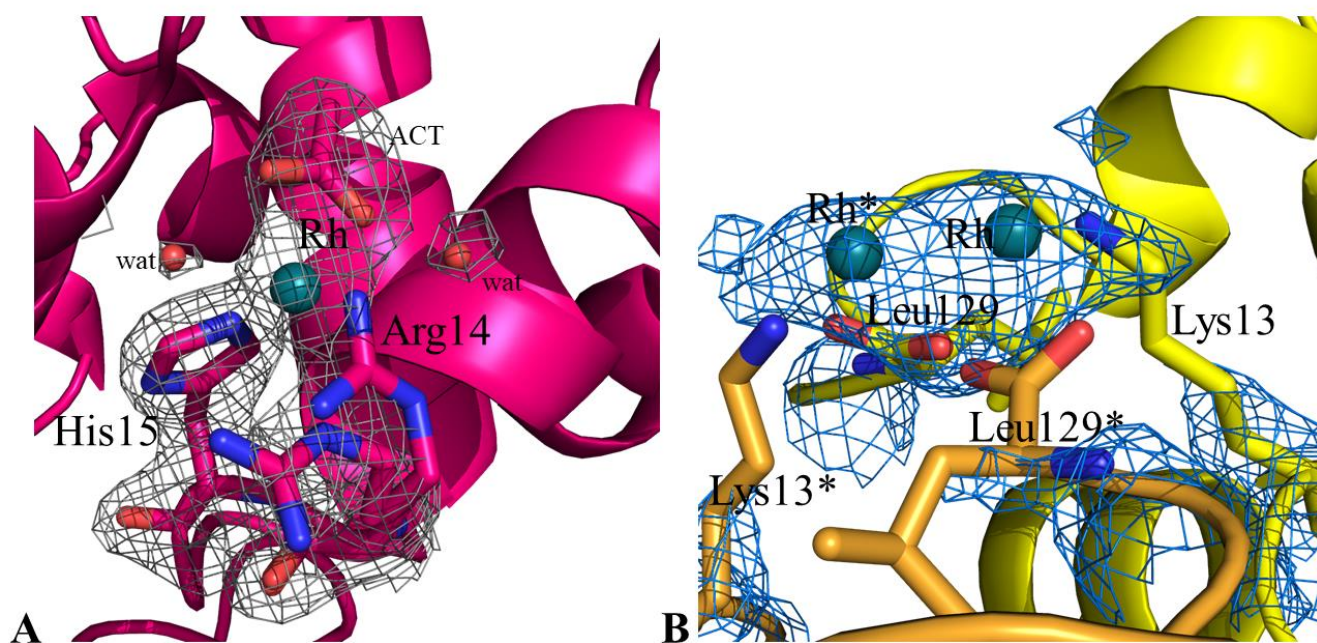

**Figure S2.** Details of Rh binding sites close to the side chains of Arg14 and His15 (**A**) and close to the C-terminal tail and the side chain of Lys13 (**B**) in Crystal 5. 2Fo-Fc electron density maps are contoured at 1.0  $\sigma$ . \* refers to atoms from symmetry related molecules.

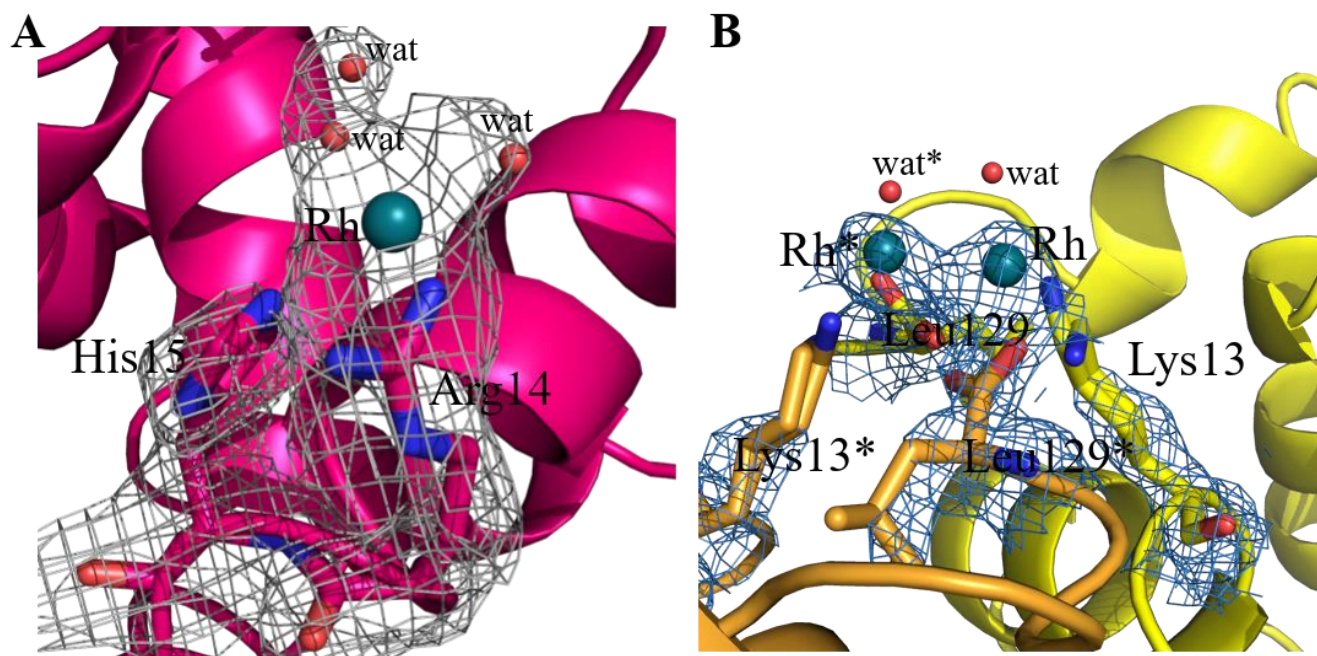

**Figure S3.** Details of Rh binding sites close to the side chains of Arg14 and His15 (**A**) and close to the C-terminal tail and the side chain of Lys13 (**B**) in Crystal 6. 2Fo-Fc electron density maps are contoured at 1.0  $\sigma$ .

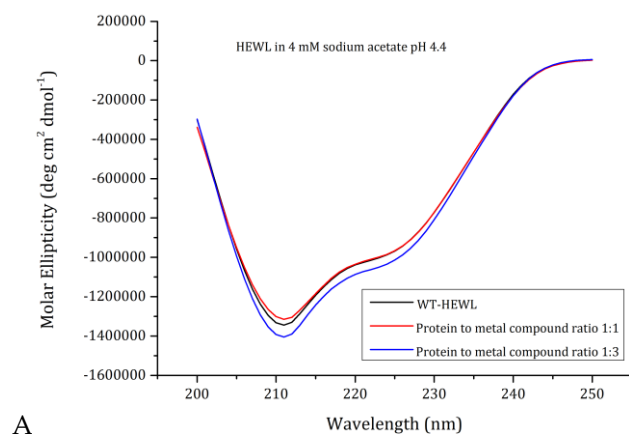

A

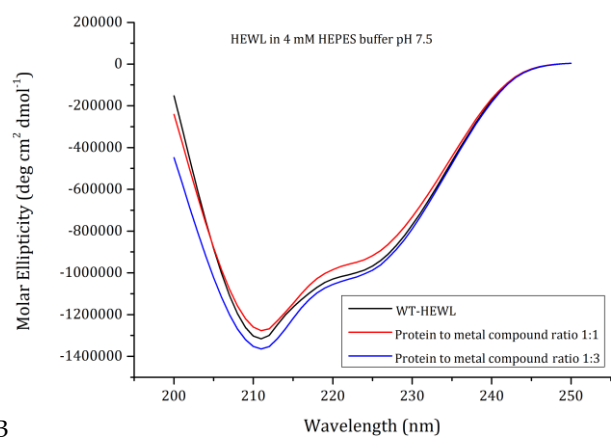

B

**Figure S4.** CD spectra of HEWL incubated for 24 h in the presence of  $[\text{Rh}_2(\mu\text{-O}_2\text{CCH}_3)_4]$  at different protein to metal compound ratios in (A) 4 mM sodium acetate buffer pH 4.4 and (B) 4 mM HEPES buffer pH 7.5.



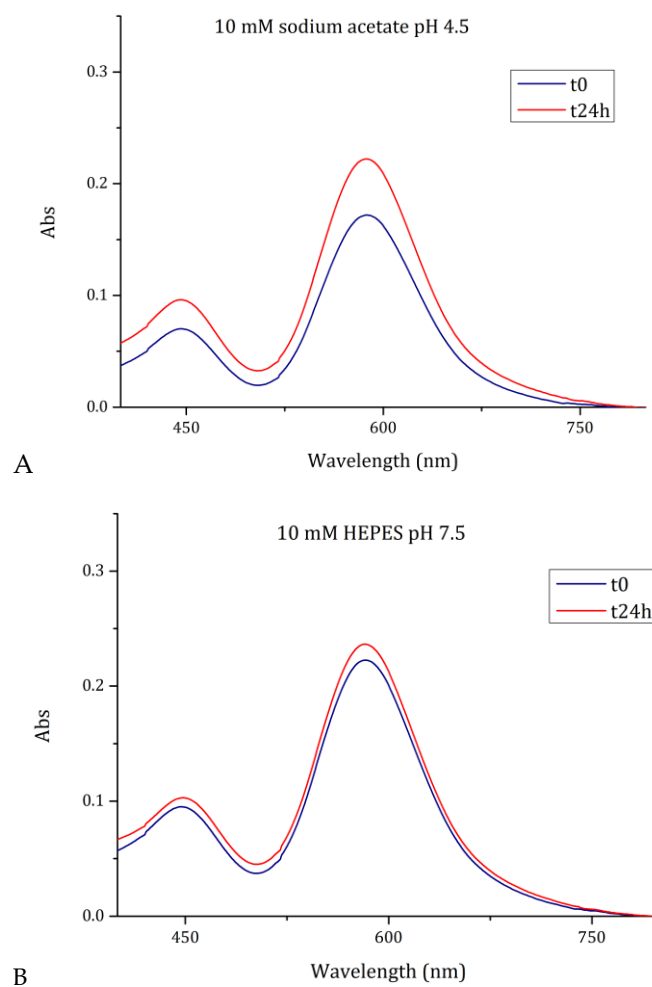

**Figure S5.** UV-Vis spectra of  $[\text{Rh}_2(\mu\text{-O}_2\text{CCH}_3)_4]$  in (A) 10 mM sodium acetate buffer at pH 4.5 and (B) 10 mM HEPES pH 7.5.
